# Supplementary material for: Myocardial deformation imaging by 2D speckle tracking echocardiography for assessment of diastolic dysfunction in murine cardiopathology
Source: PubMed Central journal article supplement (PMC10390581; doi:10.1038/s41598-023-39499-3), 2023-07-31
Supplement: 41598_2023_39499_MOESM1_ESM.pdf [file 41598_2023_39499_MOESM1_ESM.pdf]

|                                   | <b>Control</b> | <b>T2D</b>    |
|-----------------------------------|----------------|---------------|
| Global radial strain (%)          | 34.4 ± 1.7     | 34.1 ± 3.4    |
| Global circumferential strain (%) | -26.9 ± 0.9    | -24.6 ± 2.6   |
| Global longitudinal strain (%)    | -25.6 ± 1.2    | -21.6 ± 1.2*  |
| <i>Longitudinal:</i>              |                |               |
| Diastolic peak strain rate (1/s)  | 12.2 ± 0.7     | 8.20 ± 0.6*   |
| Systolic peak strain rate (1/s)   | -8.05 ± 0.5    | -7.39 ± 0.5   |
| Diastolic peak velocity (cm/s)    | -1.09 ± 0.1    | -0.74 ± 0.1*  |
| Systolic peak velocity (cm/s)     | 0.84 ± 0.04    | 0.70 ± 0.04*  |
| <i>Radial:</i>                    |                |               |
| Diastolic peak strain rate (1/s)  | -12.5 ± 0.9    | -8.41 ± 0.50* |
| Systolic peak strain rate (1/s)   | 7.33 ± 0.4     | 7.39 ± 0.6    |
| Diastolic peak velocity (cm/s)    | -1.87 ± 0.1    | -1.39 ± 0.2*  |
| Systolic peak velocity (cm/s)     | 1.32 ± 0.04    | 1.29 ± 0.1    |
| <i>Circumferential:</i>           |                |               |
| Diastolic peak strain rate (1/s)  | 12.6 ± 0.9     | 8.39 ± 0.8*   |
| Systolic peak strain rate (1/s)   | -8.88 ± 0.4    | -9.09 ± 1.0   |
| Diastolic peak velocity (cm/s)    | -221 ± 29      | -183 ± 18     |
| Systolic peak velocity (cm/s)     | 206 ± 18       | 171 ± 20      |

**Supplementary Table 1.** Benchmark values of echocardiographic myocardial wall deformation imaging in T2D mice. Data are presented as mean ± SEM. n = 7-8/group. Analyzed by Students unpaired t-test, \*p < 0.05.

**A Longitudinal strain rate**

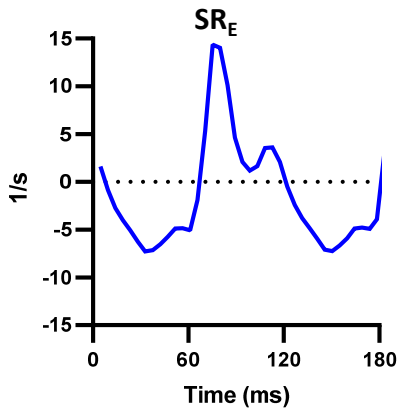

**B Radial strain rate (LAX)**

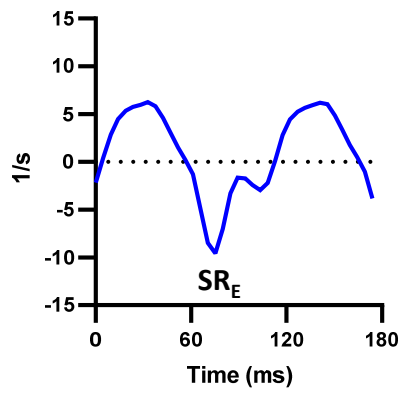

**C Circumferential strain rate**

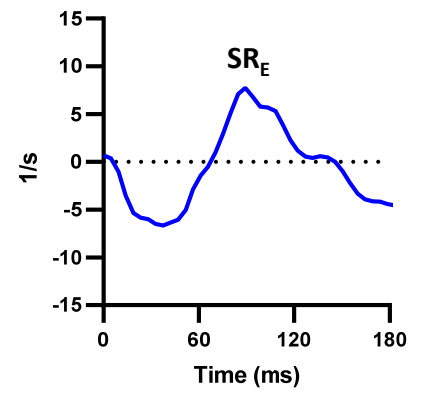

**Supplementary Figure 1.** Representative strain rate profiles for longitudinal, radial and circumferential planes. Early strain rate peak ( $E_{SR}$ ) is indicated.

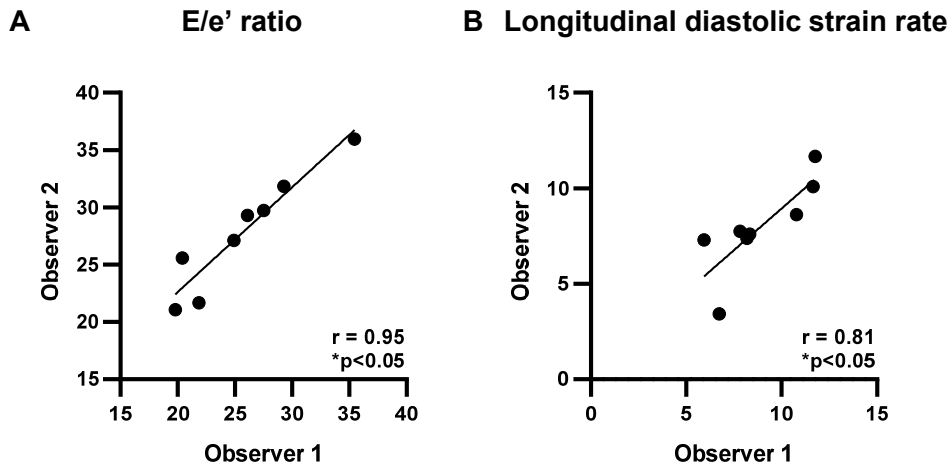

**Supplementary Figure 2.** Reproducibility analysis for E/e' ratio and longitudinal diastolic strain rate in mice, comparing two independent observers. r, Pearson correlation coefficient.

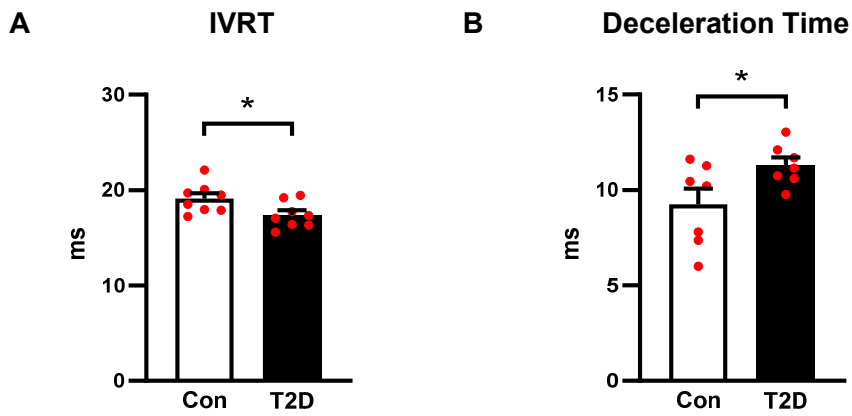

**Supplementary Figure 3.** (A) Isovolumetric relaxation time (IVRT) in T2D mice (20 weeks high fat high sugar diet). Analyzed by Students unpaired t-test. (B) Mitral valve E-wave deceleration time in T2D mice (20 weeks high fat high sugar diet). Analyzed by Students unpaired t-test. Data are presented as mean  $\pm$  SEM. n = 7-8/group. \*p < 0.05.
